# Supplementary material
Source: publisher figshare collection journal article supplement (https://diabetesjournals.figshare.com/articles/dataset/_/12733205)
Supplement: Supplementary file 2 [file 1]

## **Comparative Effectiveness of the SGLT2 Inhibitor Empagliflozin vs. Other Antihyperglycemics on Risk of Kidney Outcomes**

**Yan Xie, MPH; Benjamin Bowe, MPH; Andrew K. Gibson, MPH; Janet B. McGill, MD; Yan Yan, PhD; Geetha Maddukuri, MD; Ziyad Al-Aly, MD**

| <b>Table of Contents</b>                                                                                          | <b>Page</b> |
|-------------------------------------------------------------------------------------------------------------------|-------------|
| <b>Supplemental Figures</b>                                                                                       | 2-4         |
| Supplemental Figure 1a. Flowchart for cohort construction                                                         | 2           |
| Supplemental Figure 1b. Flowchart for analytic approach                                                           | 3           |
| Supplemental Figure 2. Unadjusted survival probability for the major adverse kidney events in the original cohort | 4           |
| <b>Supplemental Tables</b>                                                                                        | 5-14        |
| Supplemental Table 1. Treatment medications                                                                       | 5           |
| Supplemental Table 2. Antihyperglycemic initiated at time zero                                                    | 6           |
| Supplemental Table 3. Baseline characteristics in original cohort                                                 | 7-9         |
| Supplemental Table 4a. Sample size, event rate and results in the overall cohort and in subgroups                 | 10-12       |
| Supplemental Table 4b. Sample size, event rate and results for individual components of MAKE                      | 13          |
| Supplemental Table 5: Sensitivity analyses                                                                        | 14          |

## Supplemental Figures

**Supplemental Figure 1a:** Flowchart for cohort construction

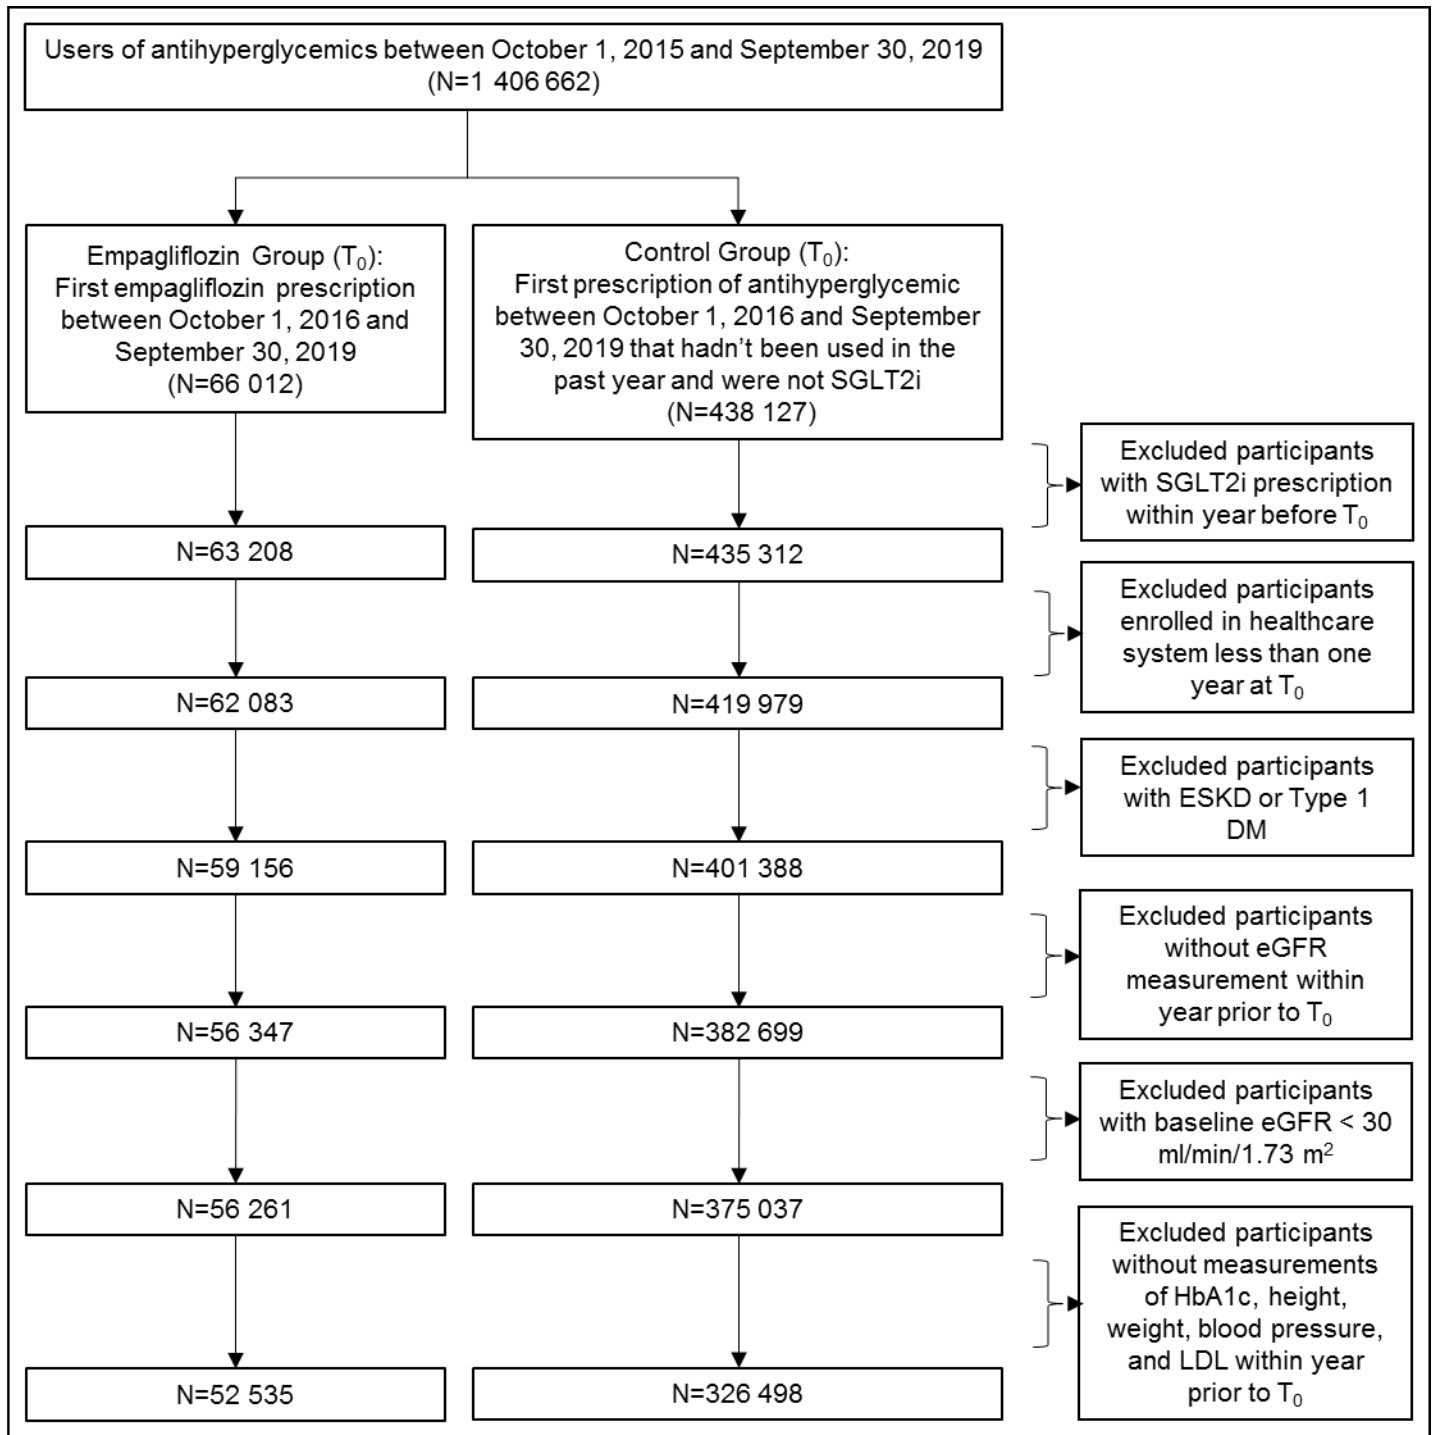

SGLT2i=sodium-glucose co-transporter-2 inhibitor. T<sub>0</sub>= time zero. ESKD=end stage kidney disease. DM=diabetes mellitus. eGFR= estimated glomerular filtration rate. HbA1c=glycated hemoglobin. LDL=low-density lipoprotein.

**Supplemental Figure 1b:** Flowchart for analytic approach

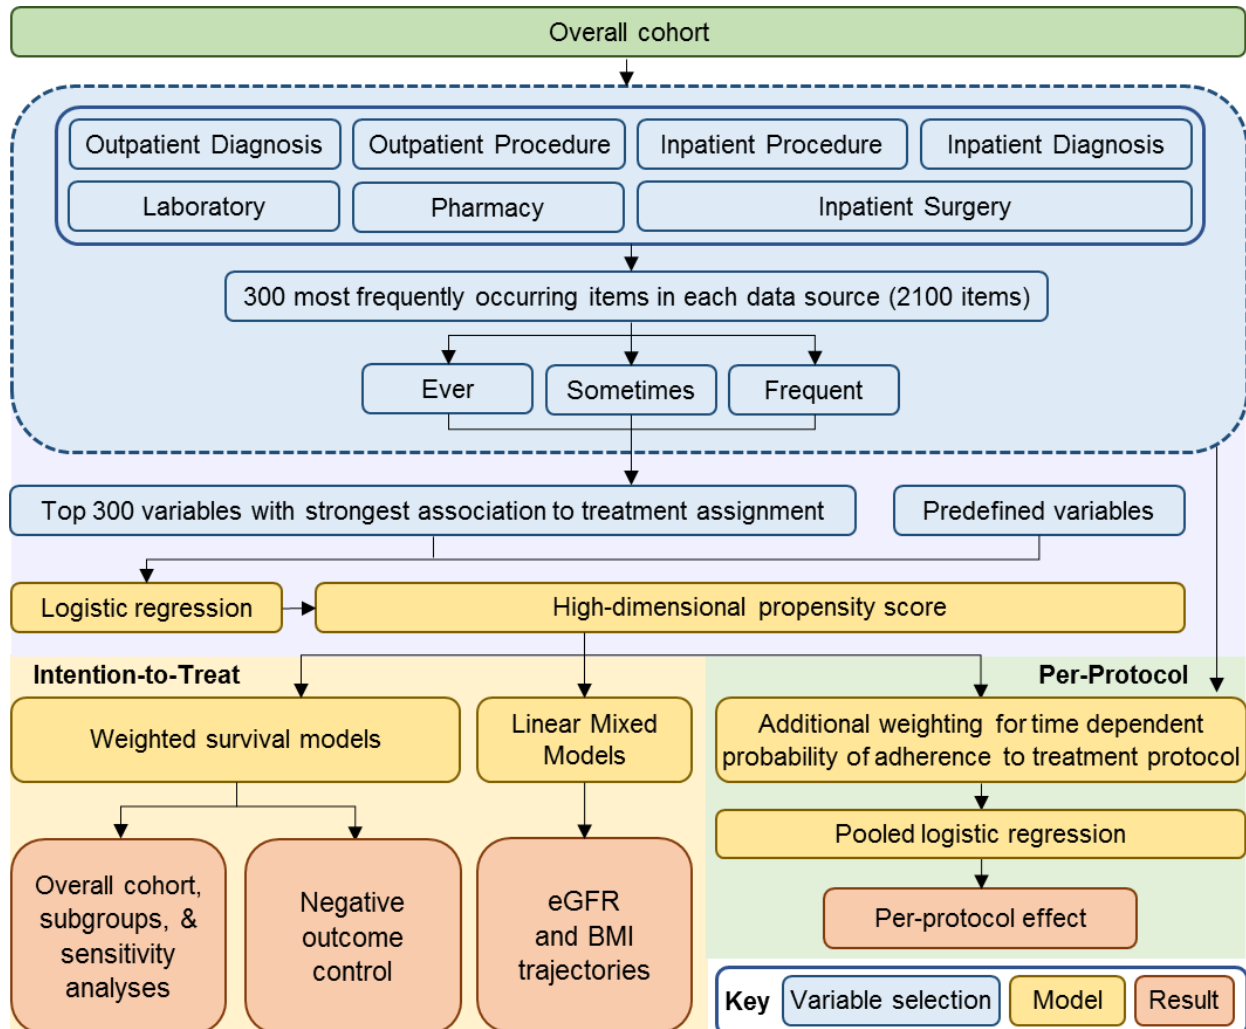

eGFR=estimated glomerular filtration rate. BMI=body mass index.

**Supplemental Figure 2:** Unadjusted survival probability for major adverse kidney events (MAKE) of estimated glomerular filtration rate (eGFR) decline >50%, end-stage kidney disease (ESKD), or all-cause mortality in the empagliflozin group (blue) and the control group of other non-SGLT2i antihyperglycemics (red) in the original cohort

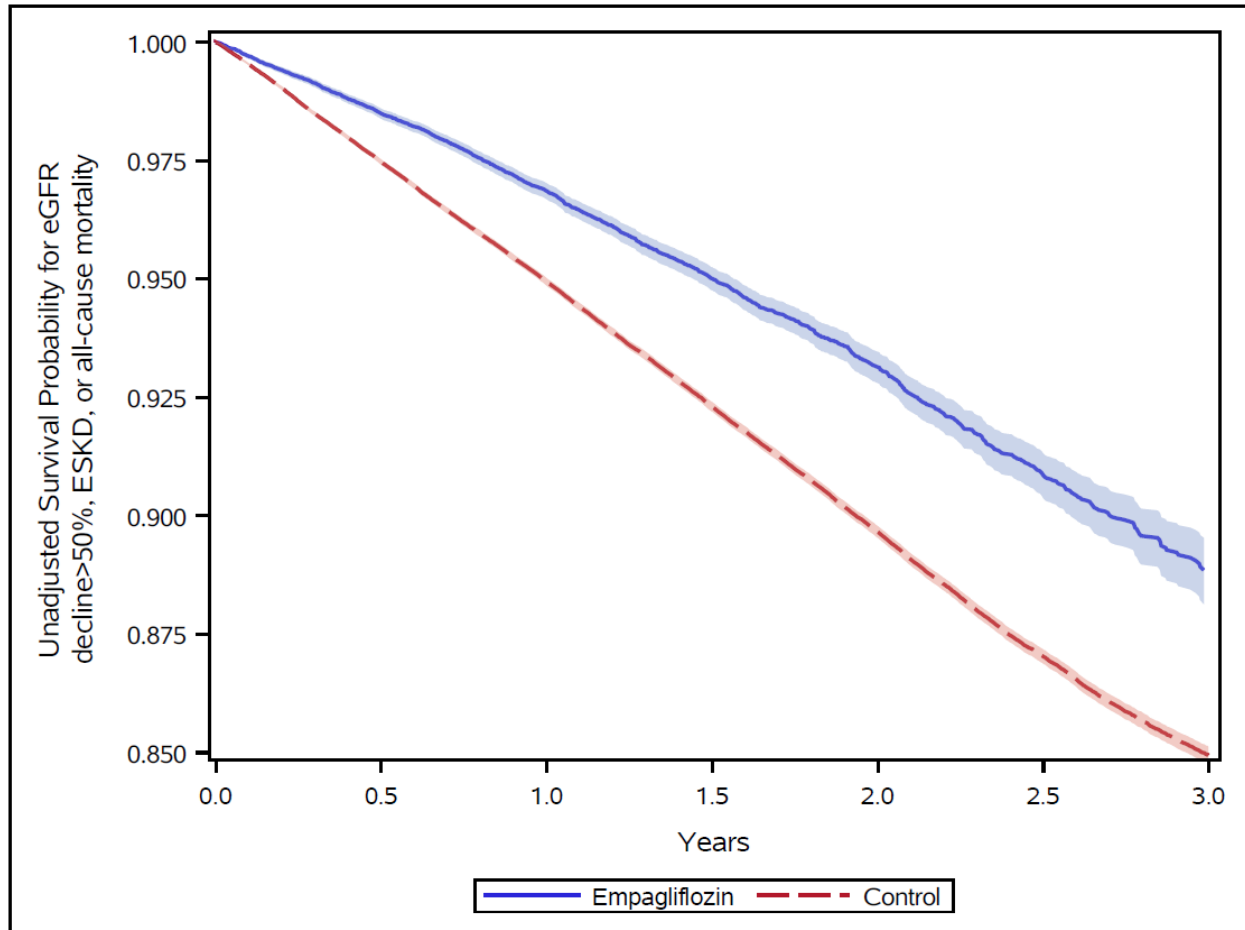

eGFR=estimated glomerular filtration rate. ESKD=end-stage kidney disease.

## Supplemental Tables

**Supplemental Table 1.** Treatment medications

| Medication class             | Medication names                                                |
|------------------------------|-----------------------------------------------------------------|
| SGLT2i                       | Empagliflozin                                                   |
| Biguanide                    | Metformin                                                       |
| Insulin                      | Insulin                                                         |
| Sulfonylureas                | Glyburide, Glipizide, Glimepiride                               |
| DPP4                         | Alogliptin, Sitagliptin, Saxagliptin, Linagliptin               |
| GLP1                         | Liraglutide, Exenatide, Semaglutide, Dulaglutide, Lixisenatide, |
| Thiazolidinediones           | Pioglitazone, Rosiglitazone                                     |
| Alpha-glucosidase inhibitors | Miglitol, Acarbose                                              |
| Meglitinides                 | Nateglinide, Repaglinide                                        |
| Amylin analogues             | Pramlintide                                                     |

SGLT2i=sodium-glucose co-transporter-2 inhibitor. DPP4=dipeptidyl peptidase-4 inhibitor. GLP1=glucagon-like peptide-1 receptor agonist.

**Supplemental Table 2.** Antihyperglycemic initiated at time zero

| <b>Medication class</b>      | <b>Original cohort</b> | <b>Weighted cohort</b> |
|------------------------------|------------------------|------------------------|
| SGLT2i                       | 52 535 (13.86%)        | 52 535 (49.85%)        |
| Biguanide                    | 97 670 (25.77%)        | 6087 (5.78%)           |
| Insulin                      | 51 683 (13.64%)        | 7288 (6.92%)           |
| Sulfonylureas                | 89 709 (23.67%)        | 7877 (7.47%)           |
| DPP4                         | 47 166 (12.44%)        | 8520 (8.08%)           |
| GLP1                         | 21 396 (5.64%)         | 17 697 (16.79%)        |
| Thiazolidinediones           | 15 678 (4.14%)         | 4546 (4.31%)           |
| Alpha-glucosidase inhibitors | 2787 (0.74%)           | 660 (0.63%)            |
| Meglitinides                 | 389 (0.10%)            | 158 (0.15%)            |
| Amylin analogues             | 20 (0.01%)             | 18 (0.02%)             |

SGLT2i=sodium-glucose co-transporter-2 inhibitor. DPP4=dipeptidyl peptidase-4 inhibitor. GLP1=glucagon-like peptide-1 receptor agonist.

**Supplemental Table 3.** Baseline characteristics in original cohort

| Baseline Characteristics              | Overall N=379 033 | Empagliflozin<br>N=52 535 (13.86%) | Other non-SGLT2i<br>antihyperglycemics<br>N=326 498 (86.14%) | Absolute standardized<br>difference |
|---------------------------------------|-------------------|------------------------------------|--------------------------------------------------------------|-------------------------------------|
| Age, years                            | 65.67 (10.65)     | 65.35 (9.23)                       | 65.72 (10.86)                                                | 0.04                                |
| Race                                  |                   |                                    |                                                              |                                     |
| White                                 | 265 153 (69.96)   | 38 697 (73.66)                     | 226 456 (69.36)                                              | 0.10                                |
| Black                                 | 71 717 (18.92)    | 7 943 (15.12)                      | 63 774 (19.53)                                               | 0.12                                |
| Other                                 | 42 163 (11.12)    | 5 895 (11.22)                      | 36 268 (11.11)                                               | <0.01                               |
| Sex                                   |                   |                                    |                                                              |                                     |
| Male                                  | 359 143 (94.75)   | 50 172 (95.50)                     | 308 971 (94.63)                                              | 0.04                                |
| Female                                | 19 890 (5.25)     | 2 363 (4.50)                       | 17 527 (5.37)                                                | 0.04                                |
| eGFR, mL/min/1.73 m <sup>2</sup>      | 76.38 (20.88)     | 77.91 (18.40)                      | 76.14 (21.24)                                                | 0.09                                |
| eGFR category                         |                   |                                    |                                                              |                                     |
| eGFR≥90 mL/min/1.73 m <sup>2</sup>    | 106 517 (28.10)   | 14 468 (27.54)                     | 92 049 (28.19)                                               | 0.01                                |
| 90>eGFR≥60 mL/min/1.73 m <sup>2</sup> | 181 141 (47.79)   | 28 206 (53.69)                     | 152 935 (46.84)                                              | 0.14                                |
| 60>eGFR≥45 mL/min/1.73 m <sup>2</sup> | 63 027 (16.63)    | 8 515 (16.21)                      | 54 512 (16.70)                                               | 0.01                                |
| 45>eGFR≥30 mL/min/1.73 m <sup>2</sup> | 28 348 (7.48)     | 1 346 (2.56)                       | 27 002 (8.27)                                                | 0.25                                |
| HbA1c, %                              | 8.68 (1.87)       | 8.69 (1.40)                        | 8.68 (1.94)                                                  | 0.01                                |
| HbA1c, mmol/mol                       | 71 (15.30)        | 71 (11.44)                         | 71 (15.87)                                                   | 0.01                                |
| Body mass index, kg/m <sup>2</sup>    | 32.88 (6.55)      | 34.06 (6.41)                       | 32.69 (6.55)                                                 | 0.21                                |
| Low-density lipoprotein, mg/dL        | 89.41 (37.13)     | 81.50 (34.37)                      | 90.68 (37.40)                                                | 0.26                                |
| Systolic blood pressure, mmHg         | 132.80 (17.12)    | 132.19 (16.25)                     | 132.90 (17.25)                                               | 0.04                                |
| Diastolic blood pressure, mmHg        | 76.20 (10.42)     | 75.08 (9.83)                       | 76.38 (10.50)                                                | 0.13                                |
| Congestive heart failure              | 27 487 (7.25)     | 5 320 (10.13)                      | 22 167 (6.79)                                                | 0.12                                |
| Alcoholism                            | 20 619 (5.44)     | 2 211 (4.21)                       | 18 408 (5.64)                                                | 0.07                                |
| Bone fracture                         | 4 663 (1.23)      | 613 (1.17)                         | 4 050 (1.24)                                                 | <0.01                               |
| Cancer                                | 73 060 (19.28)    | 10 627 (20.23)                     | 62 433 (19.12)                                               | 0.03                                |
| Cardiovascular disease                | 104 524 (27.58)   | 21 294 (40.53)                     | 83 230 (25.49)                                               | 0.32                                |
| Diabetic ketoacidosis                 | 1 336 (0.35)      | 108 (0.21)                         | 1 228 (0.38)                                                 | 0.03                                |
| Hypoglycemia                          | 7 513 (1.98)      | 1 730 (3.29)                       | 5 783 (1.77)                                                 | 0.10                                |
| Pancreatitis                          | 4 179 (1.10)      | 625 (1.19)                         | 3 554 (1.09)                                                 | 0.01                                |
| Bladder & urinary tract infections    | 12 216 (3.22)     | 1 077 (2.05)                       | 11 139 (3.41)                                                | 0.08                                |
| Venous thromboembolism                | 2 295 (0.61)      | 325 (0.62)                         | 1 970 (0.60)                                                 | <0.01                               |

|                                             |                 |                |                 |      |
|---------------------------------------------|-----------------|----------------|-----------------|------|
| Acute Kidney Injury                         | 32 677 (8.62)   | 4 705 (8.96)   | 27 972 (8.57)   | 0.01 |
| Albuminuria                                 |                 |                |                 |      |
| No albuminuria ( $\leq 30$ mg/g)            | 161 895 (42.71) | 20 827 (39.64) | 141 068 (43.21) | 0.07 |
| Microalbuminuria ( $>30$ - $\leq 300$ mg/g) | 183 259 (48.35) | 26 371 (50.20) | 156 888 (48.05) | 0.04 |
| Macroalbuminuria ( $>300$ mg/g)             | 33 879 (8.94)   | 5 337 (10.16)  | 28 542 (8.74)   | 0.05 |
| Metformin *                                 | 206 046 (54.36) | 42 156 (80.24) | 163 890 (50.20) | 0.66 |
| Insulin *                                   | 111 280 (29.36) | 29 011 (55.22) | 82 269 (25.20)  | 0.64 |
| Sulfonylureas *                             | 113 840 (30.03) | 24 901 (47.40) | 88 939 (27.24)  | 0.43 |
| DPP4 *                                      | 26 607 (7.02)   | 12 817 (24.40) | 13 790 (4.22)   | 0.60 |
| GLP1 *                                      | 10 428 (2.75)   | 6 557 (12.48)  | 3 871 (1.19)    | 0.46 |
| Thiazolidinediones *                        | 9 955 (2.63)    | 42 77 (8.14)   | 5 678 (1.74)    | 0.30 |
| Alpha-glucosidase inhibitors *              | 3 955 (1.04)    | 878 (1.67)     | 3 077 (0.94)    | 0.06 |
| Meglitinides *                              | 485 (0.13)      | 165 (0.31)     | 320 (0.10)      | 0.04 |
| Amylin analogues *                          | 66 (0.02)       | 28 (0.05)      | 38 (0.01)       | 0.02 |
| Total number of diabetes medications used   | 1.27 (0.92)     | 2.30 (0.94)    | 1.11 (0.81)     | 1.36 |
| ACE/ARB *                                   | 214 631 (56.63) | 36 566 (69.60) | 178 065 (54.54) | 0.31 |
| Calcium channel blockers *                  | 101 581 (26.80) | 15 918 (30.30) | 85 663 (26.24)  | 0.09 |
| Beta blockers *                             | 147 767 (38.99) | 26 989 (51.37) | 120 778 (36.99) | 0.29 |
| Diuretics *                                 | 140 298 (37.01) | 23 003 (43.79) | 117 295 (35.93) | 0.16 |
| Statins *                                   | 262 356 (69.22) | 44 515 (84.73) | 217 841 (66.72) | 0.43 |
| Hospital complexity                         |                 |                |                 |      |
| Outpatient clinic                           | 227 402 (60.00) | 28 123 (53.53) | 199 279 (61.04) | 0.15 |
| Health care system                          | 151 631 (40.00) | 24 412 (46.47) | 127 219 (38.96) | 0.15 |
| Year of treatment initial                   |                 |                |                 |      |
| 2016                                        | 27 704 (7.31)   | 956 (1.82)     | 26 748 (8.19)   | 0.30 |
| 2017                                        | 124 385 (32.82) | 8 439 (16.06)  | 115 946 (35.51) | 0.46 |
| 2018                                        | 125 617 (33.14) | 16 957 (32.28) | 108 660 (33.28) | 0.02 |
| 2019                                        | 101 327 (26.73) | 26 183 (49.84) | 75 144 (23.02)  | 0.58 |
| Smoking status                              |                 |                |                 |      |
| Never                                       | 172 433 (45.49) | 24 389 (46.42) | 148 044 (45.34) | 0.02 |
| Former                                      | 118 451 (31.25) | 17 260 (32.85) | 101 191 (30.99) | 0.04 |
| Current                                     | 88 149 (23.26)  | 10 886 (20.72) | 77 263 (23.66)  | 0.07 |

All values are mean (SD) or n (proportions [%]), unless specified. SGLT2i=sodium-glucose co-transporter-2 inhibitor. SD=standard



---

deviation. eGFR=estimated glomerular filtration rate. HbA1c=glycated hemoglobin. DPP4=dipeptidyl peptidase-4 inhibitor.  
GLP1=glucagon-like peptide-1 receptor agonist. ACE/ARB=angiotensin converting enzyme inhibitors/angiotensin-receptor blockers.  
\* Any prescription within one year before  $T_0$ .

**Supplemental Table 4a.** Sample size, event rate and results in the overall cohort and in subgroups

| Analyses                             |                                   | Weighted sample size * |         | Event rate per 1000 person-years (95% CI) |                       | HR (95% CI)       | Event difference per 1000 person-years (95% CI) |
|--------------------------------------|-----------------------------------|------------------------|---------|-------------------------------------------|-----------------------|-------------------|-------------------------------------------------|
|                                      |                                   | Empagliflozin          | Control | Empagliflozin                             | Control               |                   |                                                 |
| <b>Overall</b>                       |                                   | 52 535                 | 52 850  | 34.80 (33.39, 36.25)                      | 51.18 (49.53, 52.87)  | 0.68 (0.64, 0.73) | -14.99 (-17.17, -12.66)                         |
| <b>eGFR</b>                          |                                   |                        |         |                                           |                       |                   |                                                 |
| ≥90 ml/min/1.73m <sup>2</sup>        |                                   | 14 468                 | 14 564  | 24.93 (22.72, 27.30)                      | 35.60 (33.06, 38.29)  | 0.70 (0.60, 0.82) | -10.22 (-13.84, -6.01)                          |
| ≥60 to <90 ml/min/1.73m <sup>2</sup> |                                   | 28 206                 | 29 006  | 34.55 (32.66, 36.53)                      | 52.55 (50.31, 54.86)  | 0.66 (0.60, 0.73) | -16.56 (-19.70, -13.13)                         |
| ≥45 to <60 ml/min/1.73m <sup>2</sup> |                                   | 8 515                  | 8 308   | 50.34 (46.11, 54.86)                      | 64.97 (60.24, 69.97)  | 0.78 (0.69, 0.89) | -12.94 (-18.59, -6.67)                          |
| ≥30 to <45 ml/min/1.73m <sup>2</sup> |                                   | 1 346                  | 1 231   | 59.26 (46.84, 73.96)                      | 83.59 (68.84, 100.60) | 0.71 (0.55, 0.92) | -21.22 (-33.72, -5.90)                          |
| <b>Albuminuria</b>                   |                                   |                        |         |                                           |                       |                   |                                                 |
| None (≤30 mg/g)                      |                                   | 20 827                 | 20 723  | 21.00 (19.28, 22.82)                      | 32.23 (30.18, 34.37)  | 0.65 (0.57, 0.75) | -10.44 (-13.08, -7.44)                          |
| Microalbuminuria (>30- ≤300 mg/g)    |                                   | 26 371                 | 26 464  | 38.60 (36.52, 40.76)                      | 53.46 (51.09, 55.92)  | 0.72 (0.66, 0.79) | -13.59 (-16.72, -10.21)                         |
| Macroalbuminuria (>300 mg/g)         |                                   | 5 337                  | 5 444   | 72.01 (65.57, 78.92)                      | 98.84 (91.54, 106.60) | 0.74 (0.62, 0.88) | -22.02 (-32.75, -9.76)                          |
| <b>eGFR and Albuminuria</b>          |                                   |                        |         |                                           |                       |                   |                                                 |
| eGFR≥ 60 ml/min/1.73m <sup>2</sup>   | No albuminuria (≤30 mg/g)         | 17 906                 | 18 112  | 19.51 (17.74, 21.41)                      | 31.11 (28.45, 33.96)  | 0.63 (0.56, 0.71) | -10.78 (-12.76, -8.58)                          |
|                                      | Microalbuminuria (>30- ≤300 mg/g) | 21 160                 | 21 591  | 35.27 (33.08, 37.57)                      | 51.06 (47.91, 54.37)  | 0.70 (0.65, 0.76) | -14.75 (-17.38, -11.94)                         |
|                                      | Macroalbuminuria (>300 mg/g)      | 3 608                  | 3 769   | 66.95 (59.58, 74.99)                      | 88.05 (77.65, 99.45)  | 0.77 (0.67, 0.89) | -17.13 (-25.11, -8.21)                          |
| eGFR< 60 ml/min/                     | No albuminuria (≤30 mg/g)         | 2 921                  | 2 771   | 30.62 (25.12, 36.97)                      | 44.07 (36.58, 52.64)  | 0.71 (0.57, 0.88) | -13.66 (-20.51, -5.33)                          |
|                                      | Microalbuminuria                  | 5 211                  | 5 020   | 53.18 (47.60, 58.76)                      | 69.31 (62.16, 76.46)  | 0.77 (0.68, 0.88) | -13.55 (-19.17, -7.28)                          |

|                       |                             |        |        |                      |                        |                   |                         |
|-----------------------|-----------------------------|--------|--------|----------------------|------------------------|-------------------|-------------------------|
| 1.73m <sup>2</sup>    | (>30- ≤300 mg/g)            |        |        | 59.22)               | 77.07)                 |                   |                         |
|                       | Macroalbuminuria(>300 mg/g) | 1 729  | 1 601  | 83.94 (71.40, 98.04) | 103.10 (87.55, 120.70) | 0.82 (0.68, 0.99) | -15.98 (-29.27, -0.91)  |
| <b>CVD</b>            |                             |        |        |                      |                        |                   |                         |
| Yes                   |                             | 21 294 | 21 410 | 46.57 (44.04, 49.20) | 69.77 (66.74, 72.90)   | 0.67 (0.61, 0.74) | -19.98 (-23.86, -15.78) |
| No                    |                             | 31 241 | 30 242 | 26.58 (24.99, 28.25) | 35.49 (33.69, 37.36)   | 0.76 (0.69, 0.83) | -8.60 (-11.09, -5.88)   |
| <b>ACE/ARB use</b>    |                             |        |        |                      |                        |                   |                         |
| Yes                   |                             | 36 566 | 37 452 | 37.47 (35.72, 39.27) | 54.07 (52.07, 56.14)   | 0.70 (0.64, 0.76) | -15.03 (-17.88, -11.96) |
| No                    |                             | 15 969 | 15 355 | 28.58 (26.28, 31.03) | 40.31 (37.62, 43.15)   | 0.71 (0.63, 0.81) | -10.78 (-14.02, -7.14)  |
| <b>Metformin use</b>  |                             |        |        |                      |                        |                   |                         |
| Yes                   |                             | 42 156 | 43 953 | 32.53 (31.01, 34.09) | 50.02 (48.24, 51.85)   | 0.65 (0.60, 0.71) | -15.92 (-18.56, -13.06) |
| No                    |                             | 10 379 | 9 838  | 44.17 (40.62, 47.95) | 63.48 (59.19, 68.01)   | 0.70 (0.63, 0.77) | -17.42 (-21.40, -13.08) |
| <b>Statin use</b>     |                             |        |        |                      |                        |                   |                         |
| Yes                   |                             | 44 515 | 45 700 | 35.71 (34.16, 37.31) | 51.79 (50.01, 53.62)   | 0.69 (0.64, 0.75) | -14.53 (-17.06, -11.82) |
| No                    |                             | 8 020  | 7 443  | 29.79 (26.53, 33.33) | 43.92 (39.93, 48.19)   | 0.68 (0.58, 0.80) | -13.17 (-17.35, -8.37)  |
| <b>Diuretic use</b>   |                             |        |        |                      |                        |                   |                         |
| Yes                   |                             | 23 003 | 23 492 | 47.36 (44.88, 49.94) | 64.81 (62.03, 67.69)   | 0.73 (0.67, 0.80) | -15.13 (-18.94, -11.00) |
| No                    |                             | 29 532 | 29 106 | 25.07 (23.49, 26.73) | 38.29 (36.39, 40.26)   | 0.66 (0.60, 0.74) | -12.69 (-15.24, -9.88)  |
| <b>Insulin use</b>    |                             |        |        |                      |                        |                   |                         |
| Yes                   |                             | 29 011 | 28 320 | 40.95 (38.92, 43.06) | 55.18 (52.87, 57.56)   | 0.75 (0.68, 0.82) | -12.73 (-16.06, -9.12)  |
| No                    |                             | 23 524 | 22 073 | 26.88 (25.02, 28.83) | 40.02 (37.76, 42.38)   | 0.67 (0.60, 0.75) | -11.99 (-14.56, -9.15)  |
| <b>BMI</b>            |                             |        |        |                      |                        |                   |                         |
| >30 kg/m <sup>2</sup> |                             | 37 933 | 38 440 | 32.80 (31.20,        | 46.87 (45.04,          | 0.70 (0.65, 0.77) | -13.01 (-15.59, -10.22) |

|                              |        |        |                      |                       |                   |                         |
|------------------------------|--------|--------|----------------------|-----------------------|-------------------|-------------------------|
|                              |        |        | 34.45)               | 48.76)                |                   |                         |
| >25 to ≤30 kg/m <sup>2</sup> | 12 027 | 11 713 | 35.88 (32.89, 39.05) | 54.66 (51.04, 58.46)  | 0.66 (0.57, 0.76) | -16.78 (-21.22, -11.75) |
| ≤25 kg/m <sup>2</sup>        | 2 575  | 2 386  | 61.34 (52.84, 70.82) | 90.83 (80.36, 102.30) | 0.68 (0.55, 0.83) | -23.66 (-33.48, -12.04) |

HR=hazard ratio. CI=confidence interval. eGFR=estimated glomerular filtration rate. CVD=cardiovascular disease.

ACE/ARB=angiotensin converting enzyme inhibitors/angiotensin-receptor blockers. BMI=body mass index.

\* Sample size based on subgroup specific weighting

**Supplemental Table 4b.** Sample size, event rate and results for individual components of MAKE

| Analyses                  | Weighted sample size |         | Event rate per 1000 person-years (95% CI) |                      | HR (95% CI)       | Event difference per 1000 person-years (95% CI) |
|---------------------------|----------------------|---------|-------------------------------------------|----------------------|-------------------|-------------------------------------------------|
|                           | Empagliflozin        | Control | Empagliflozin                             | Control              |                   |                                                 |
| MAKE                      | 52 535               | 52 850  | 34.80 (33.39, 36.25)                      | 51.18 (49.53, 52.87) | 0.68 (0.64, 0.73) | -14.99 (-17.17, -12.66)                         |
| eGFR decline >50%         | 52 535               | 52 850  | 19.51 (18.47, 20.61)                      | 29.45 (18.20, 30.74) | 0.72 (0.66, 0.79) | -8.54 (-10.46, -6.45)                           |
| ESKD                      | 52 535               | 52 850  | 3.63 (3.19, 4.12)                         | 5.34 (4.82, 5.90)    | 0.69 (0.57, 0.84) | -1.76 (-2.45, -0.91)                            |
| All-cause mortality       | 52 535               | 52 850  | 15.11 (14.19, 16.06)                      | 24.67 (23.54, 25.83) | 0.61 (0.56, 0.68) | -8.83 (-10.17, -7.37)                           |
| eGFR decline >50% or ESKD | 52 535               | 52 850  | 21.22 (20.13, 22.36)                      | 29.61 (28.36, 30.90) | 0.72 (0.66, 0.79) | -8.48 (-10.41, -6.39)                           |

HR=hazard ratio. CI=confidence interval. eGFR=estimated glomerular filtration rate. ESKD=end stage kidney disease

**Supplemental Table 5.** Sensitivity analyses

| <b>Analyses</b>                                                                                                                                     | <b>HR (95% CI)</b> |
|-----------------------------------------------------------------------------------------------------------------------------------------------------|--------------------|
| Variable ratio propensity score matching                                                                                                            | 0.73 (0.69, 0.77)  |
| Controlled for time dependent body mass index                                                                                                       | 0.71 (0.66, 0.76)  |
| Controlled for time dependent HbA1c                                                                                                                 | 0.73 (0.68, 0.78)  |
| Controlled for both time dependent body mass index and HbA1c                                                                                        | 0.72 (0.67, 0.77)  |
| Within patients enrolled in years 2016 and 2017                                                                                                     | 0.70 (0.64, 0.77)  |
| Within patients enrolled in years 2018 and 2019                                                                                                     | 0.65 (0.59, 0.72)  |
| Excluded patients with events within 180 days from time zero                                                                                        | 0.67 (0.62, 0.73)  |
| eGFR decline>50% based on 2 eGFR separated by at least 30 days                                                                                      | 0.61 (0.51, 0.73)  |
| ESKD was defined as dialysis, kidney transplantation, or eGFR less than 15 ml/min/1.73m <sup>2</sup> on 2 separate occasions at least 30 days apart | 0.53 (0.36, 0.80)  |
| Traffic related injury (negative control)                                                                                                           | 1.10 (0.88, 1.38)  |

HR=hazard ratio. CI=confidence interval. HbA1c=glycated hemoglobin. eGFR=estimated glomerular filtration rate.
